# Supplementary material
Source: PubMed Central journal article supplement (PMC7737664)
Supplement: NIHMS1638601-supplement-Figures.pdf [file NIHMS1638601-supplement-Figures.pdf]

**TRANSPIRE: A computational pipeline to elucidate intracellular protein movements from  
spatial proteomics datasets**

Michelle A. Kennedy, William A. Hofstadter, and Ileana M. Cristea\*

Department of Molecular Biology, Princeton University, Washington Road, Princeton,  
NJ 08544

\* Corresponding author

Address reprint requests to:

Ileana M. Cristea

210 Lewis Thomas Laboratory

Department of Molecular Biology

Princeton University

Princeton, NJ 08544

Email: [icristea@princeton.edu](mailto:icristea@princeton.edu)

Tel: 6092589417

Fax: 609258457

## SUPPLEMENTAL FIGURES

| <b>Figure</b> | <b>Description</b>                                                                                                                                  | <b>Page number</b> |
|---------------|-----------------------------------------------------------------------------------------------------------------------------------------------------|--------------------|
| S1            | Density fractionation of cellular organelles results in overlap between organelle and translocation profiles                                        | 3                  |
| S2            | Assessing classifier performance and reliability                                                                                                    | 5                  |
| S3            | Determining an appropriate translocation and co-translocation score/distance cutoffs and investigating cellular abundance of translocating proteins | 7                  |
| S4            | Enriched gene ontology associations for translocating proteins                                                                                      | 8-22               |
| S5            | Investigating LDLR abundance, translocation profiles of adaptor protein complexes and DAPK3 induced upon HCMV infection                             | 23                 |

FIGURE S1

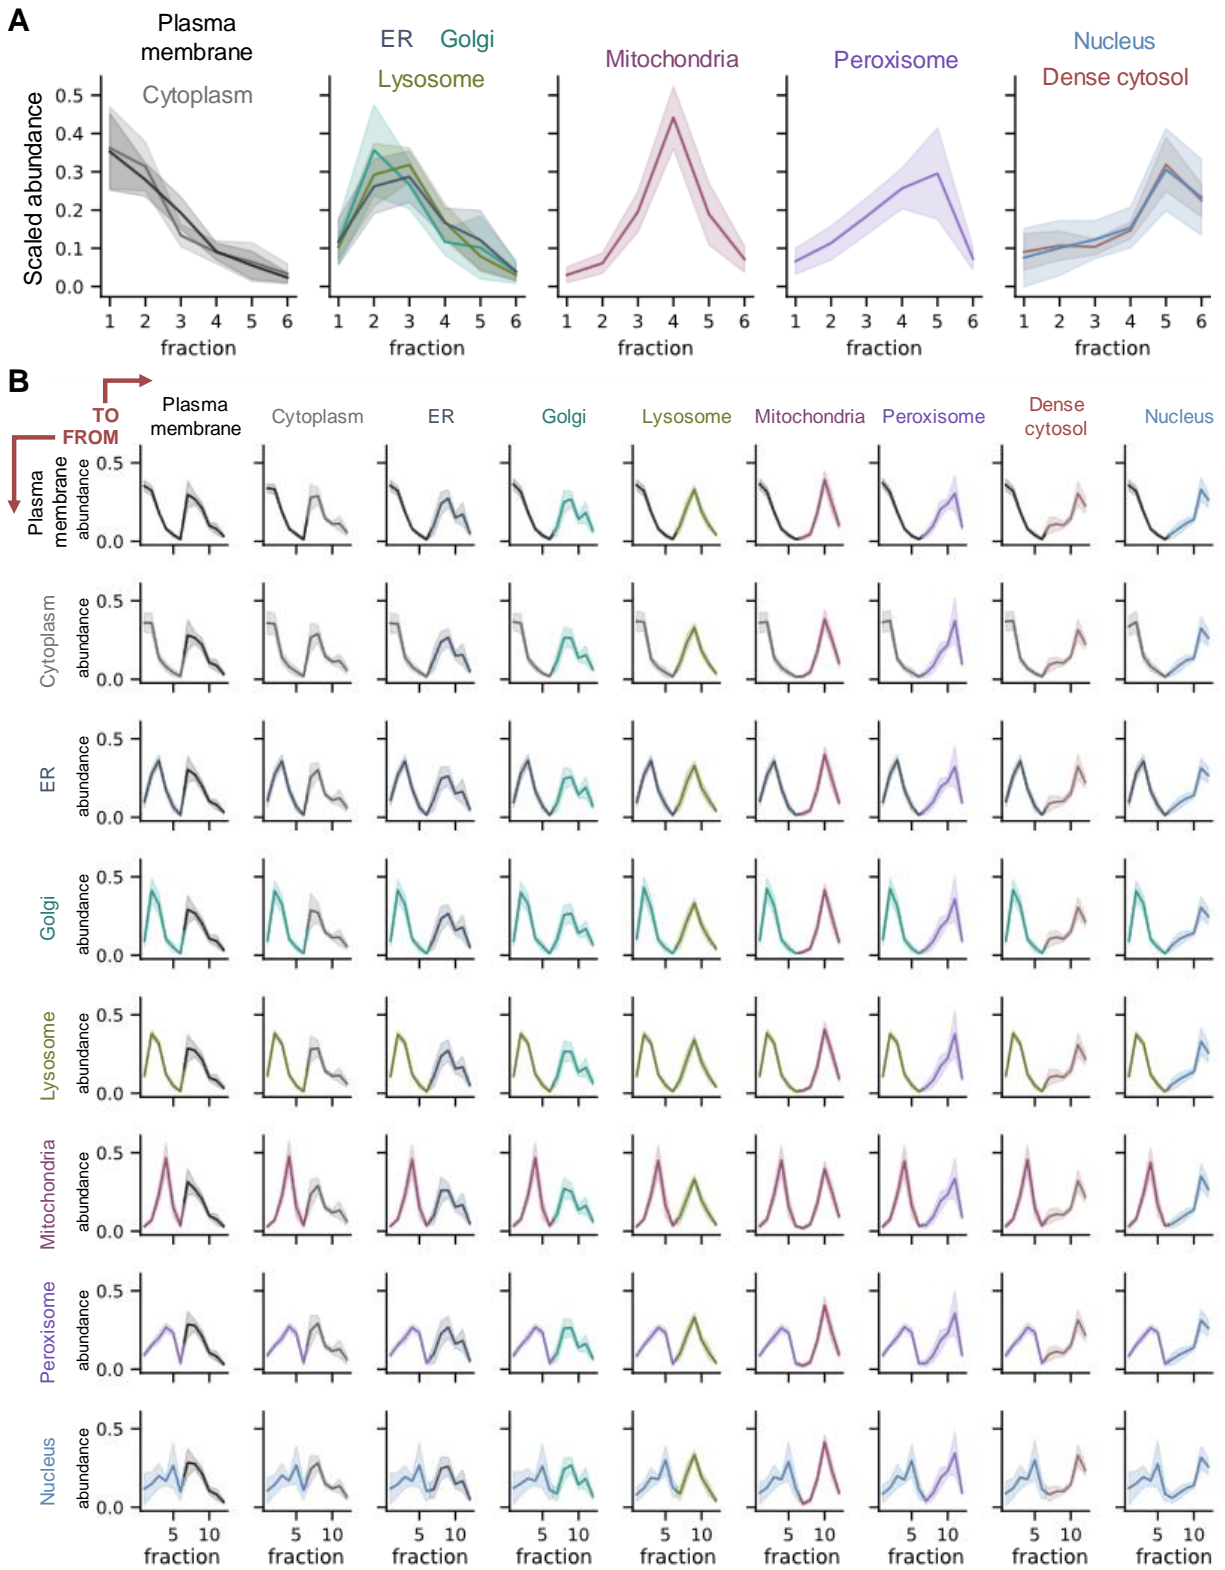

## FIGURE S1

**Figure S1: Density fractionation of cellular organelles results in overlap between organelle and translocation profiles. A)** Spatial profiles of organelle markers across timepoints throughout HCMV infection. **B)** Synthetic translocation profiles generated using the organelle markers from above. Note that fractions 1-6 correspond to the uninfected state, while fractions 7-12 correspond to the HCMV-infected state. Solid lines and shaded region represent the mean and standard deviation, respectively, of marker profiles for a given organelle or spatial profiles for a given translocation.

FIGURE S2

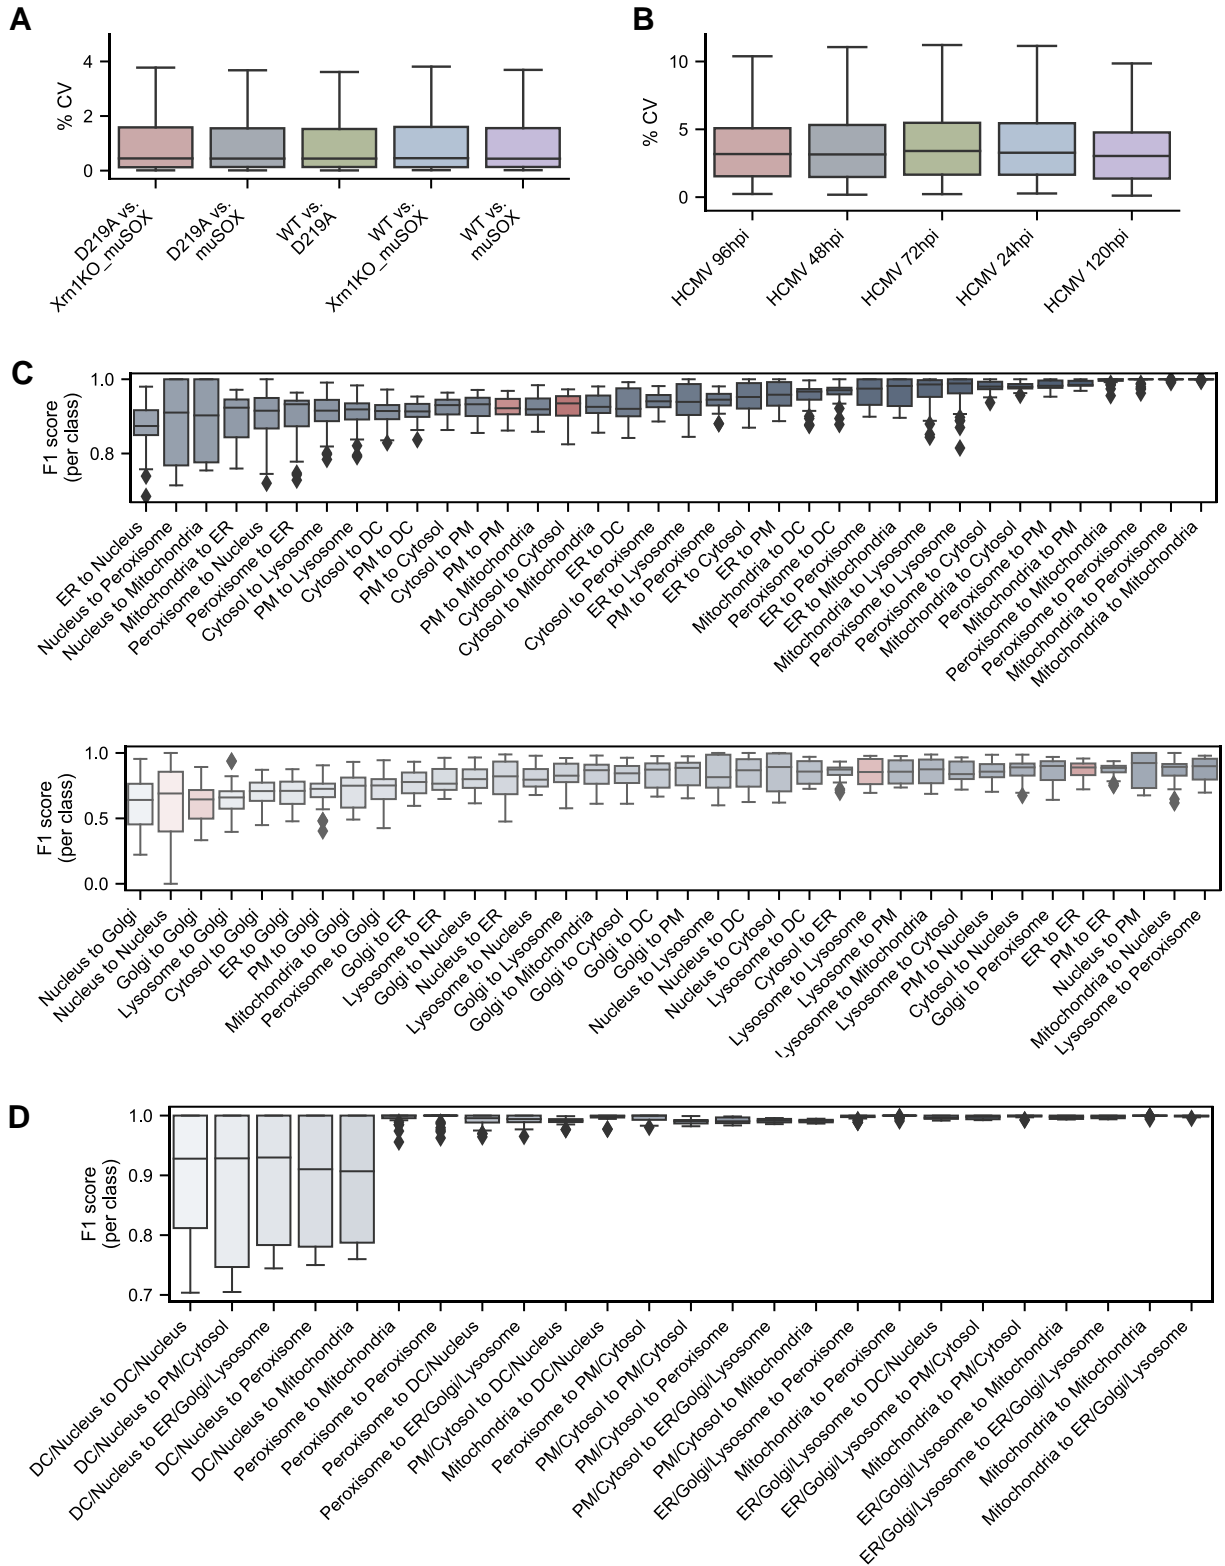

**Figure S2: Assessing classifier performance and reliability.** Variance in classifier predictions due to use of the soft-max likelihood function, which can only provide a

## FIGURE S2

stochastic estimate of model variational expectations. Boxplots represent the distribution of 100 individual evaluations of the trained classifier on either the **(A)** Gilbertson et al. 2018 or **(B)** Jean Beltran et al. 2016 datasets. **(C)** Classifier performance on the test data partition from analysis of Jean Beltran et al. 2016. Unweighted F1 scores are reported on a per-class basis for classifier predictions across all conditions analyzed in the dataset. Red boxes highlight non-translocating classes, while blue boxes denote translocation classes. **(D)** Unweighted F1 scores when ambiguous organelles are grouped together.

FIGURE S3

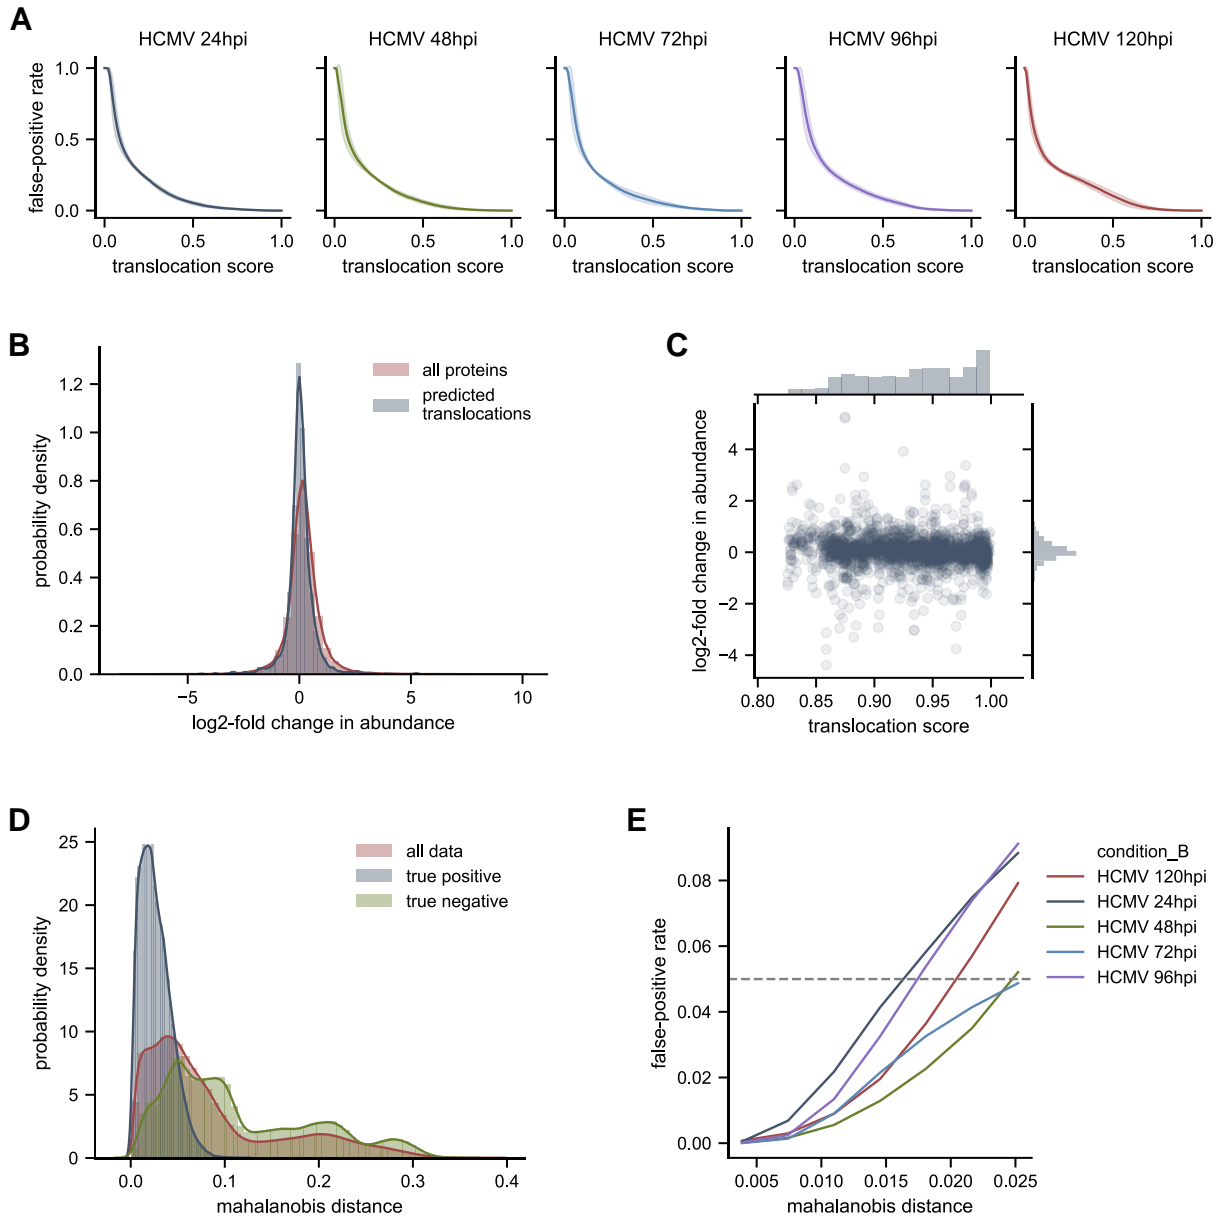

**Figure S3: Determining an appropriate translocation and co-translocation score/distance cutoffs and investigating cellular abundance of translocating proteins. A)** False-positive rates for translocation prediction based on classifier performance on the test data. **B)** Change in protein abundance upon infection for all proteins in the HCMV dataset (red) vs. TRANSPIRE predicted translocations (blue). **C)** Plot of translocation score vs. change in abundance for proteins predicted to translocate. **D)** Mahalanobis distance calculations between all predicted translocations (“all data,” red), translocating proteins annotated to the same CORUM complex (“true positive,” blue), and marker proteins for different subcellular organelles (“true negative,” green). **E)** False-positive rate vs. mahalanobis distance as calculated from the distributions in D on a per-condition basis.

FIGURE S4

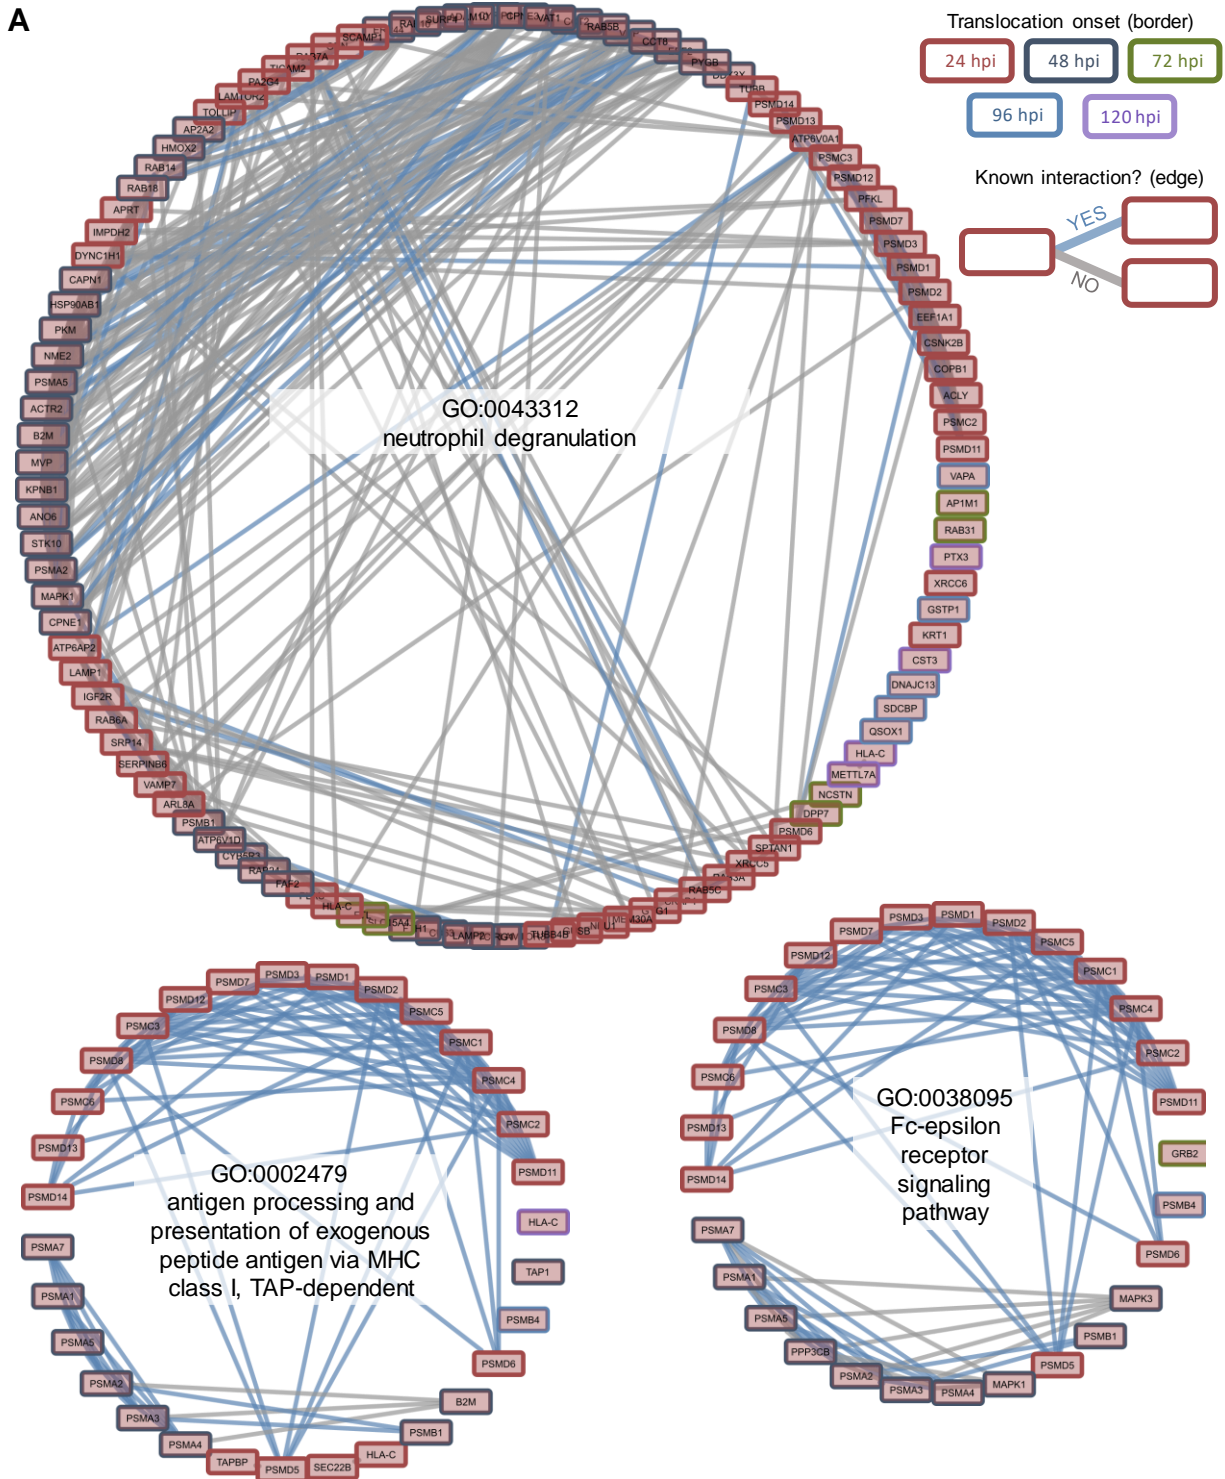

(continued on following page)



FIGURE S4

A (continued from previous page)

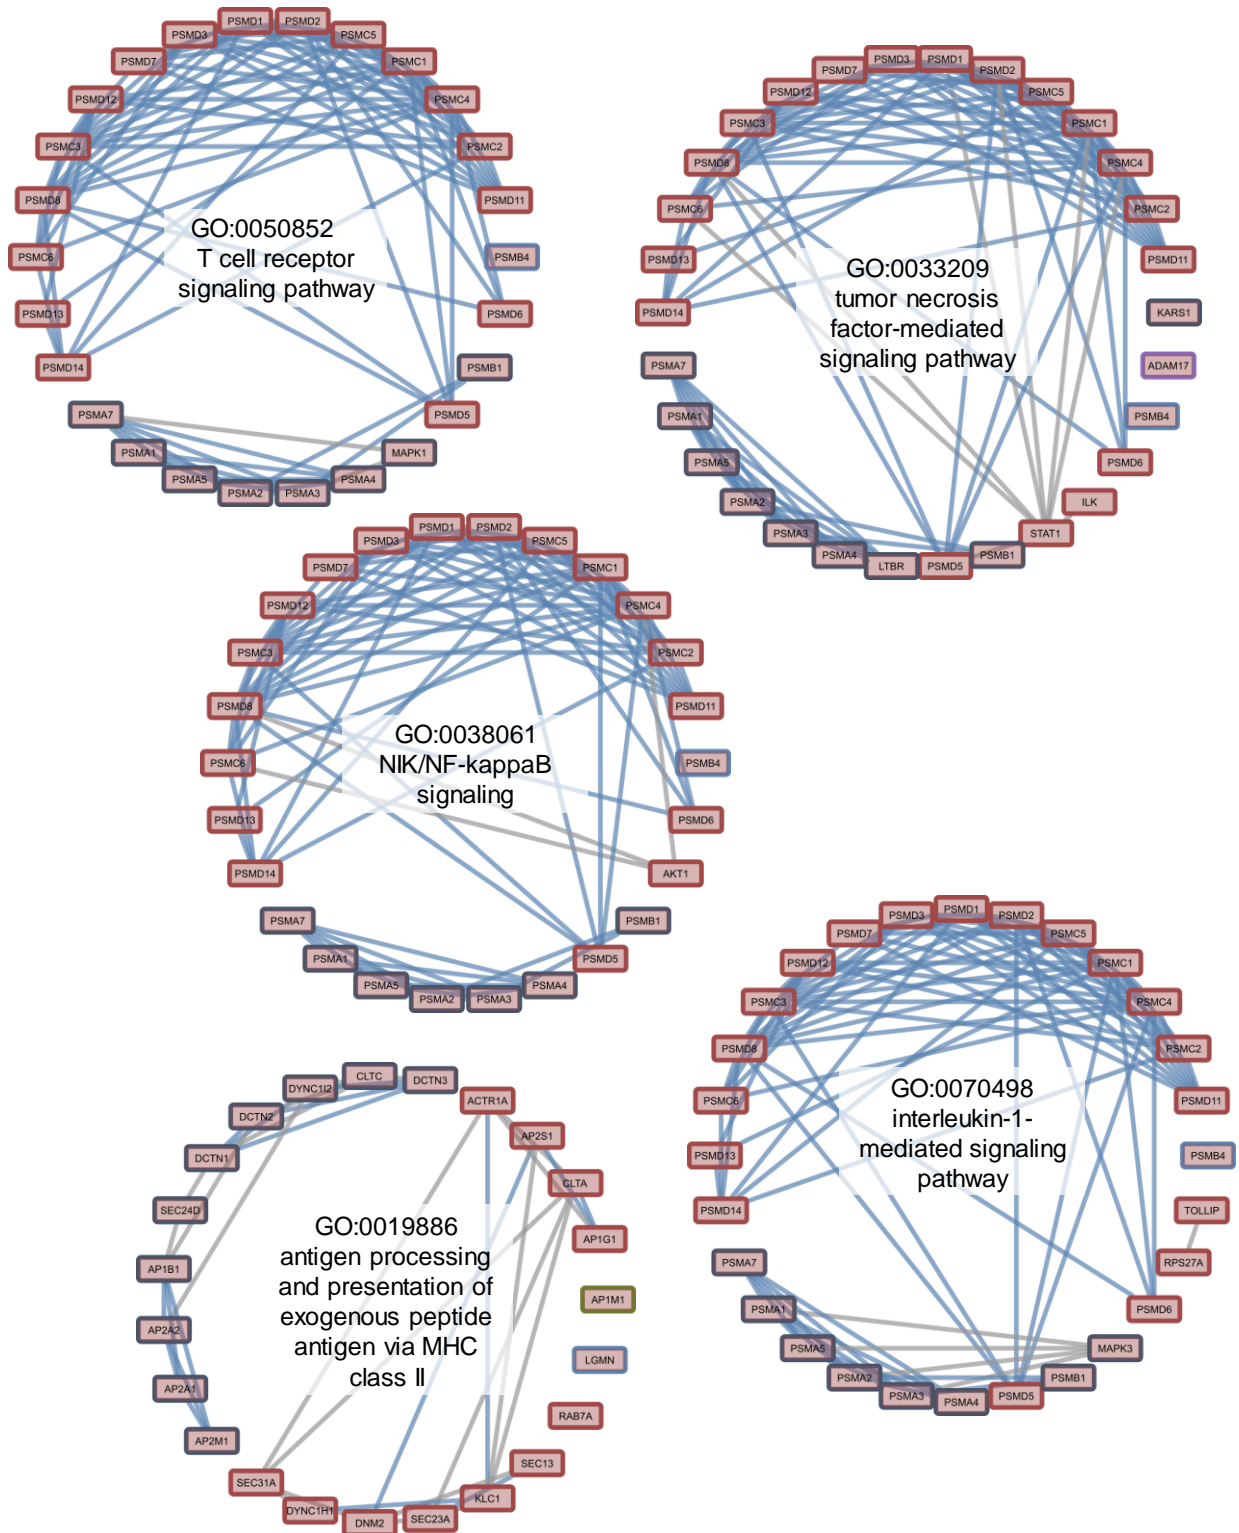

FIGURE S4

B

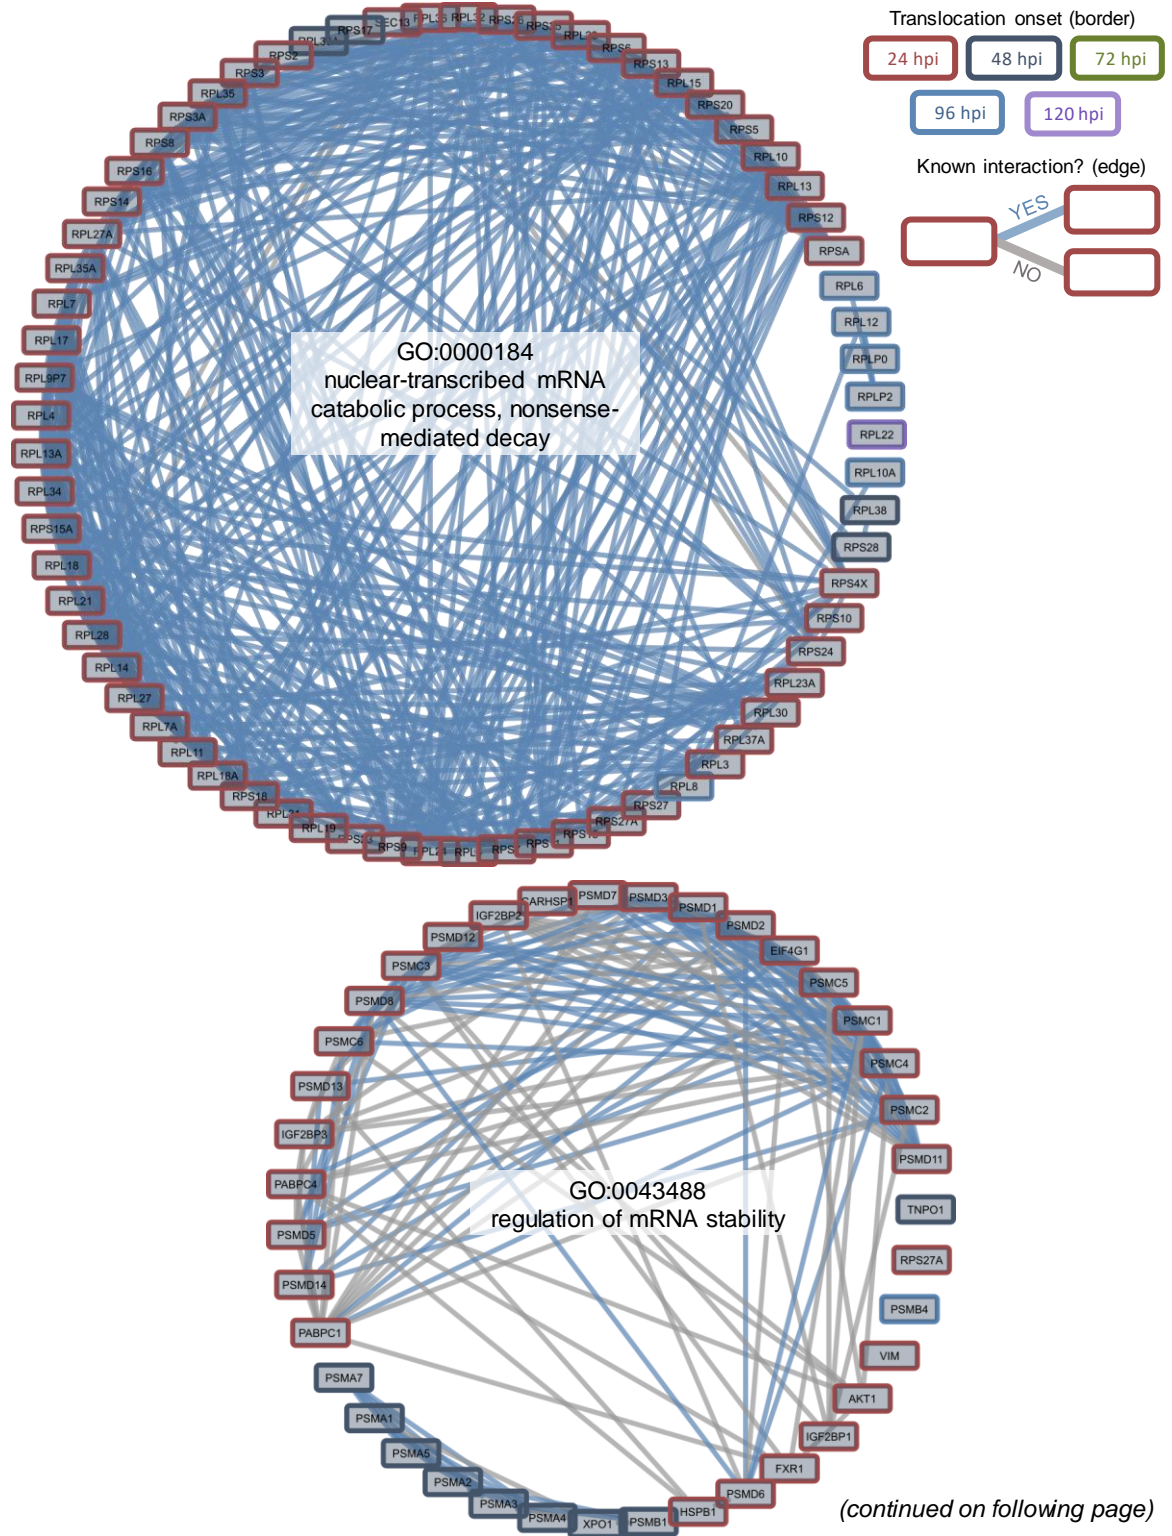

FIGURE S4

**B** (continued from previous page)

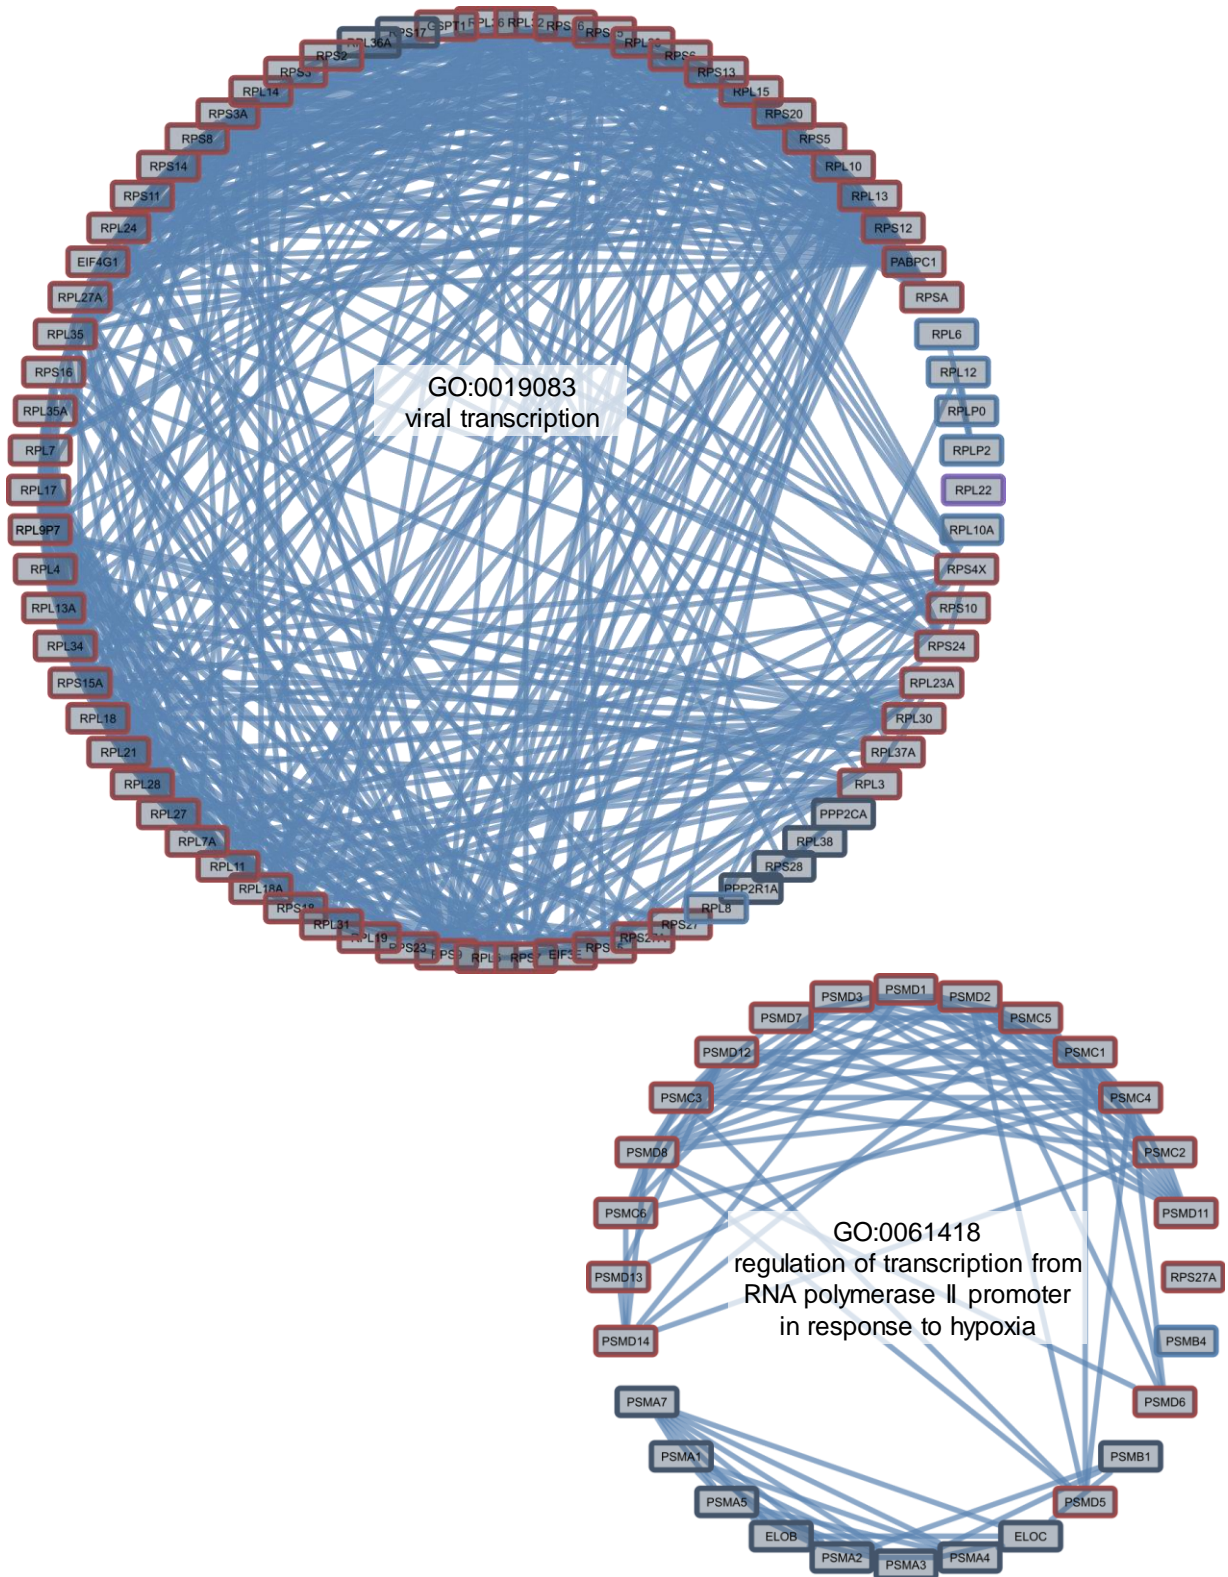

FIGURE S4

C

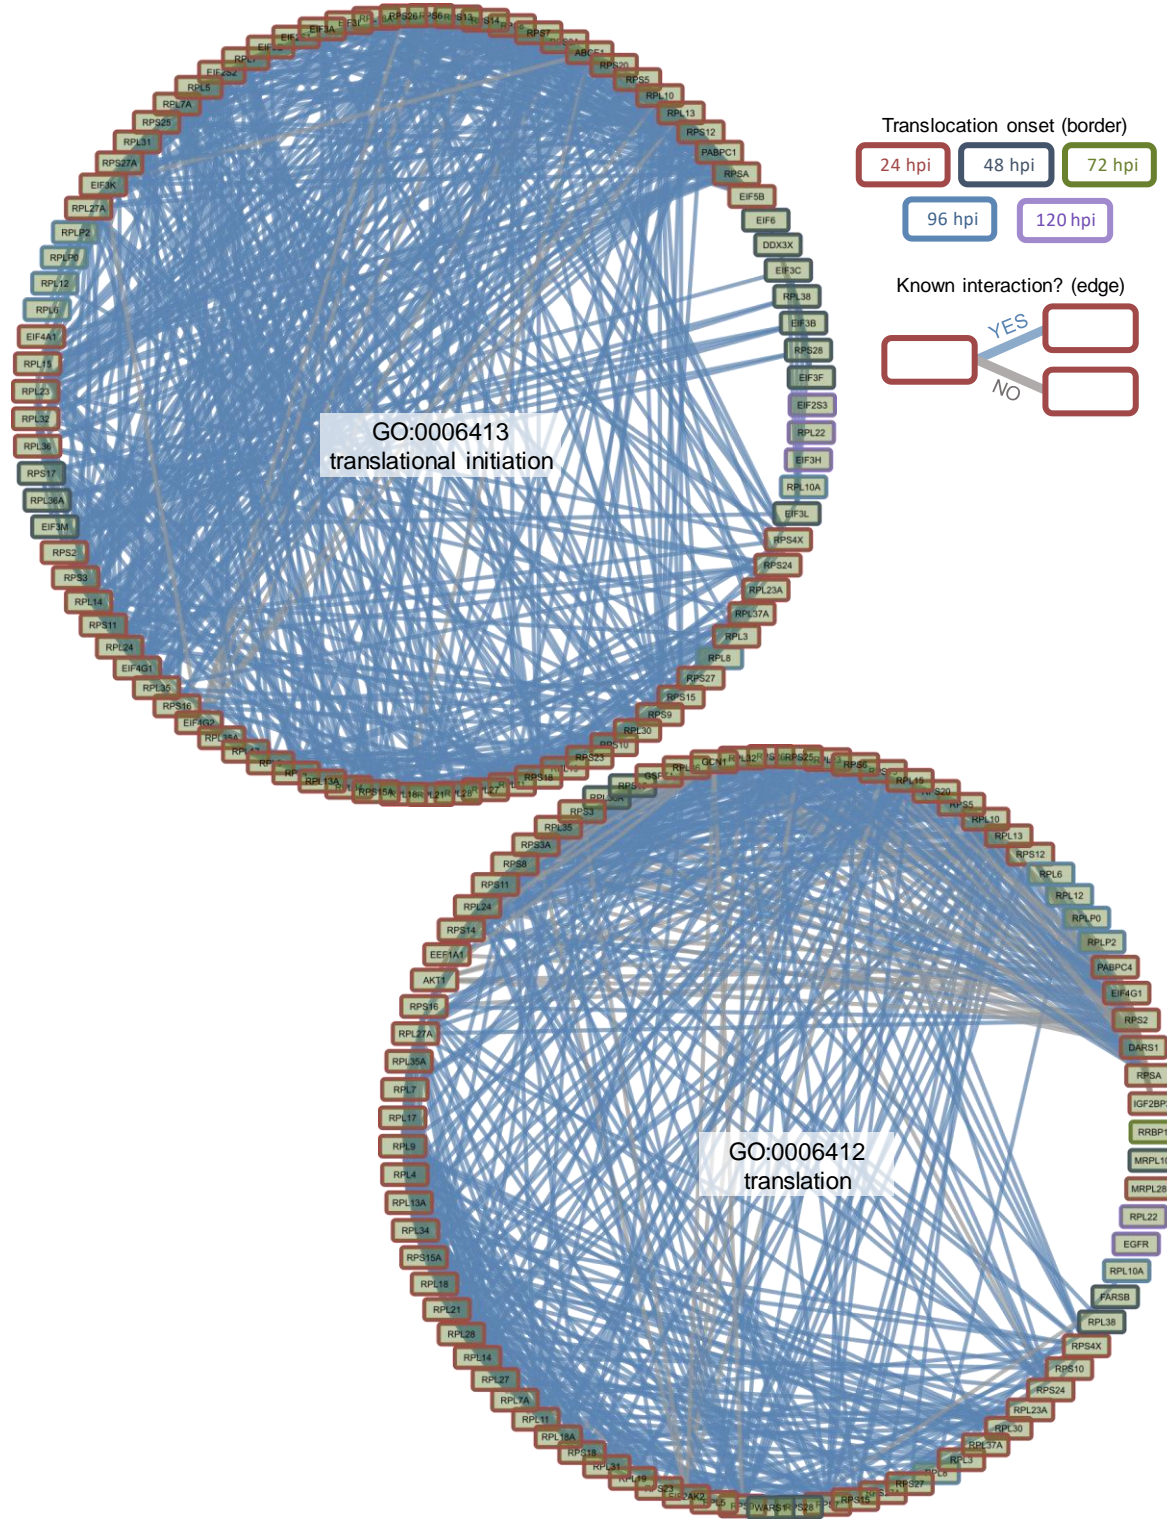

(continued on following page)

FIGURE S4

C (continued from previous page)

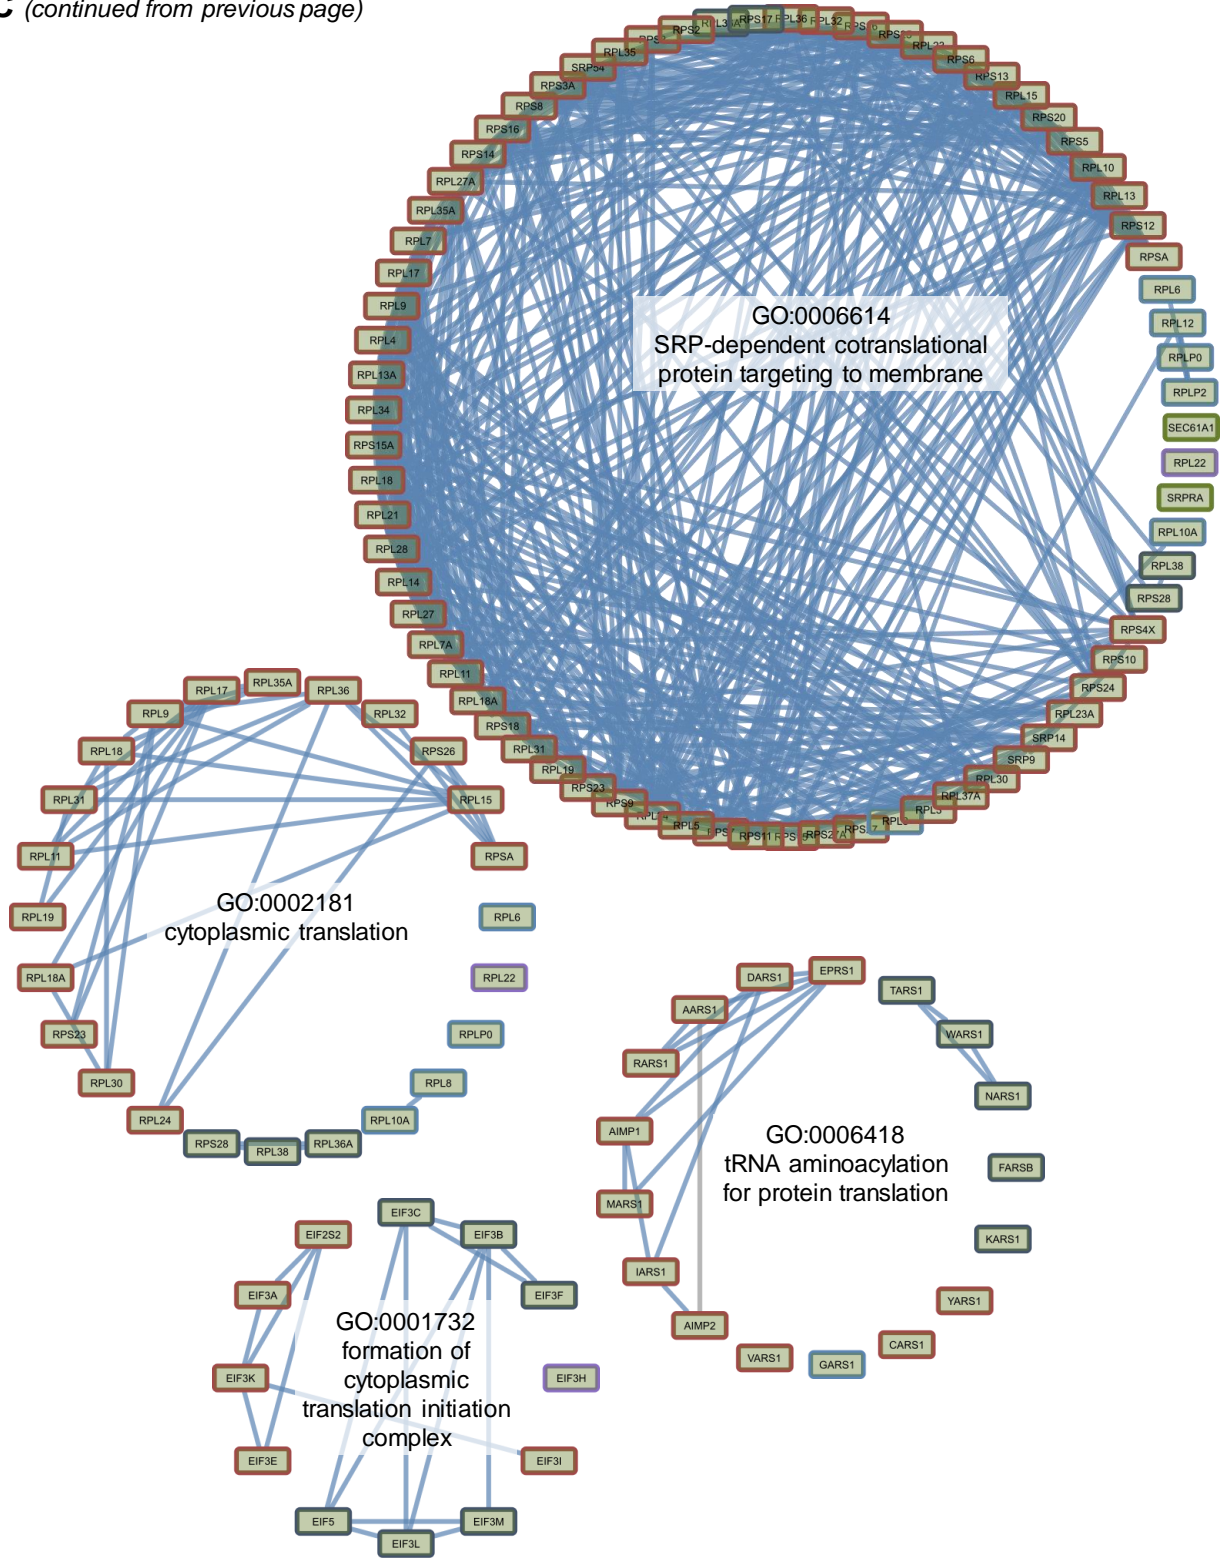

FIGURE S4

D

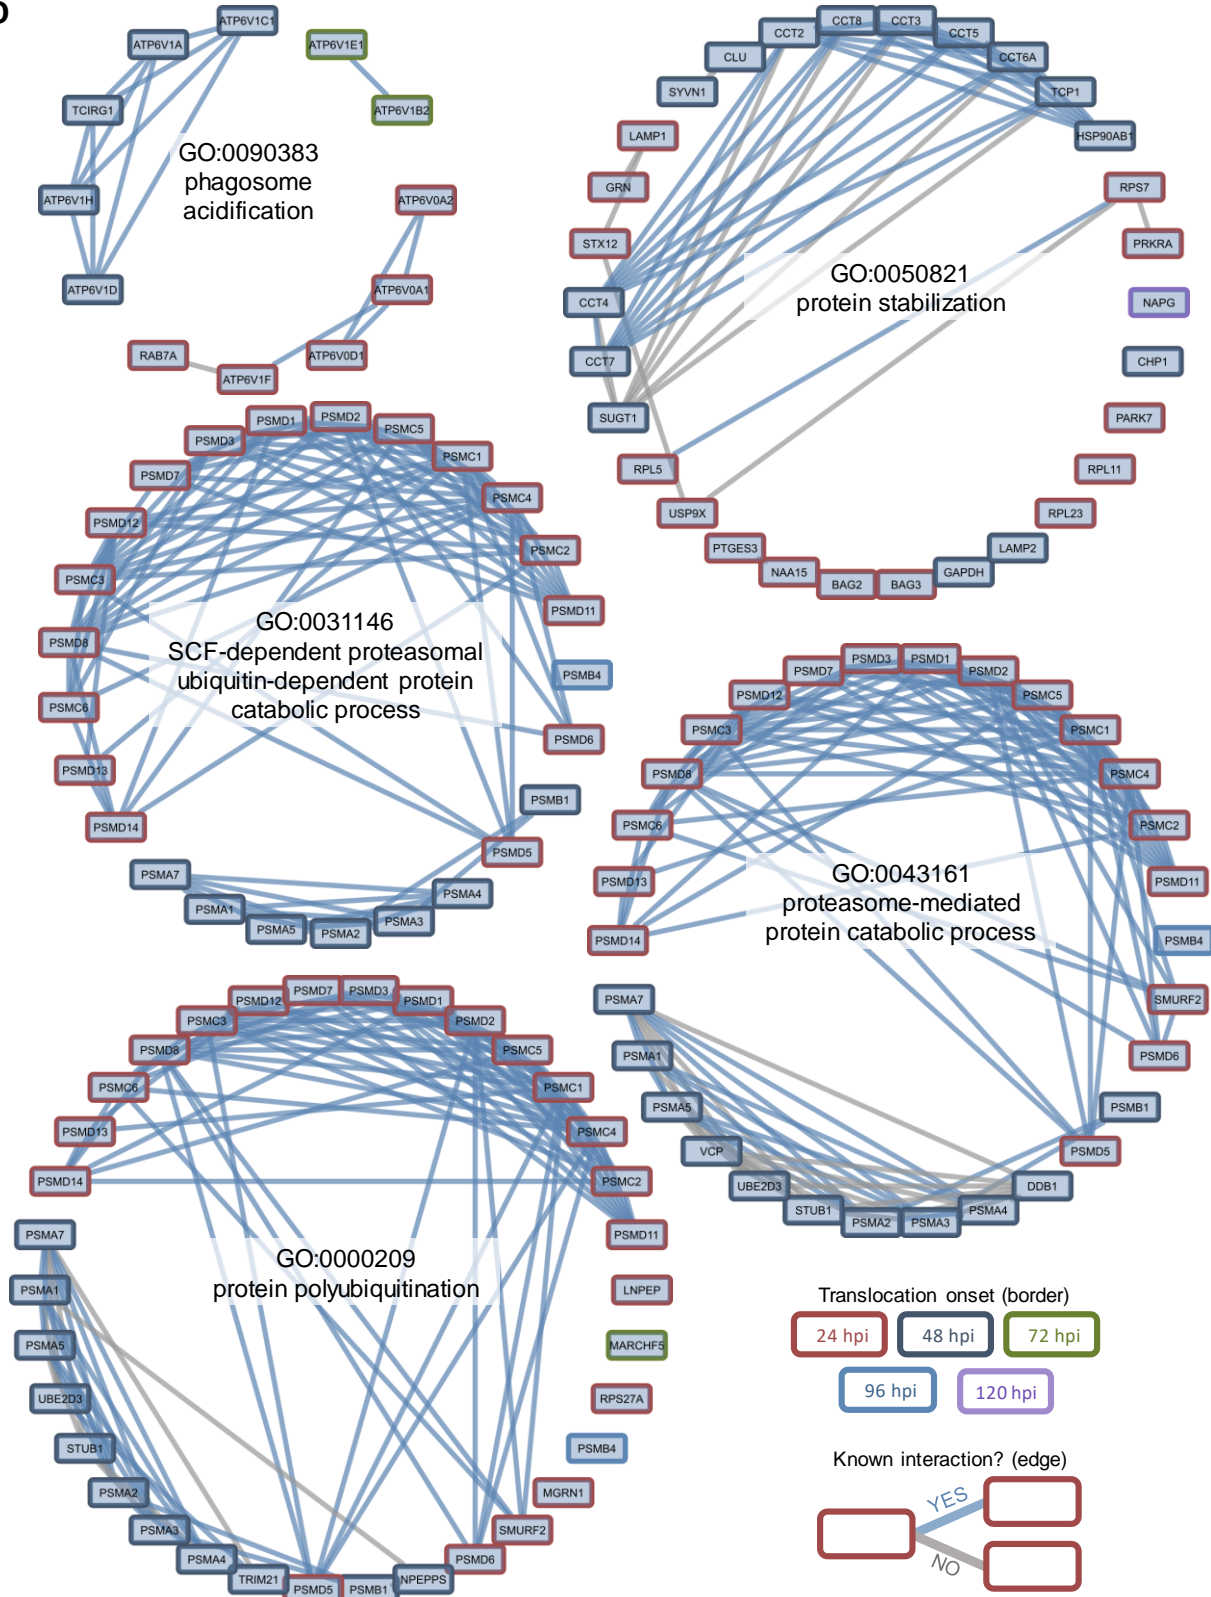

FIGURE S4

E

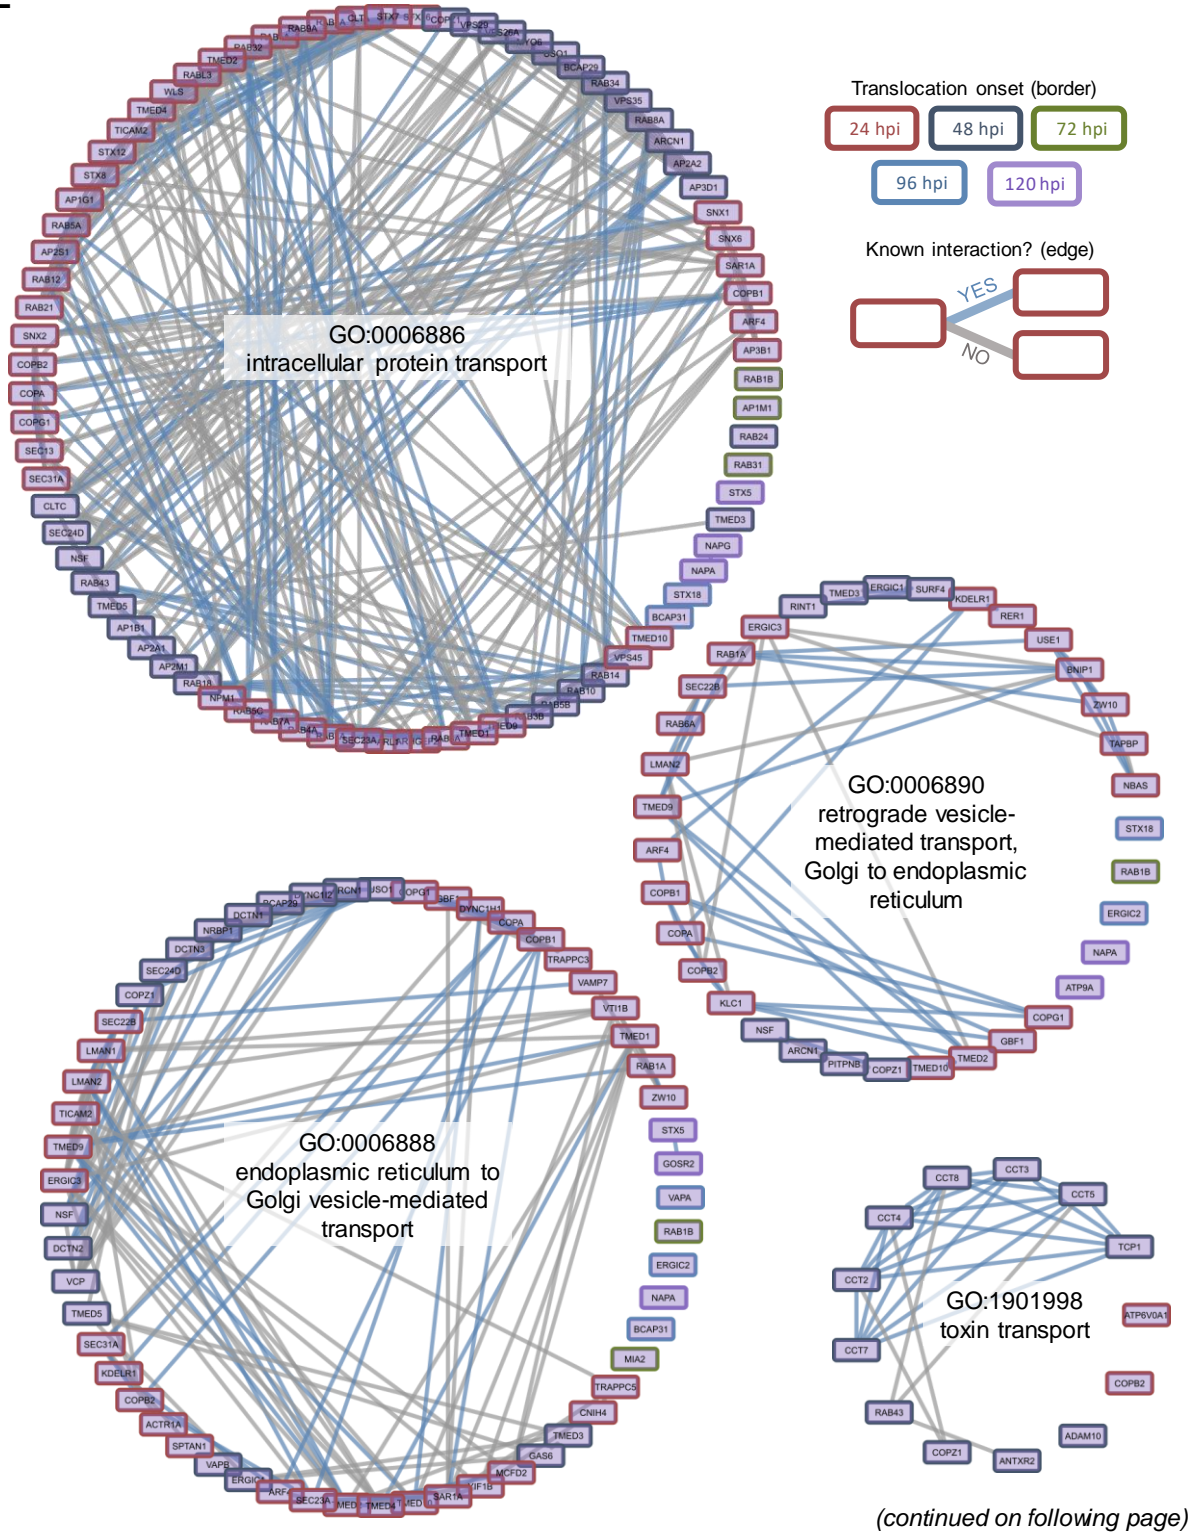

FIGURE S4

E (continued from previous page)

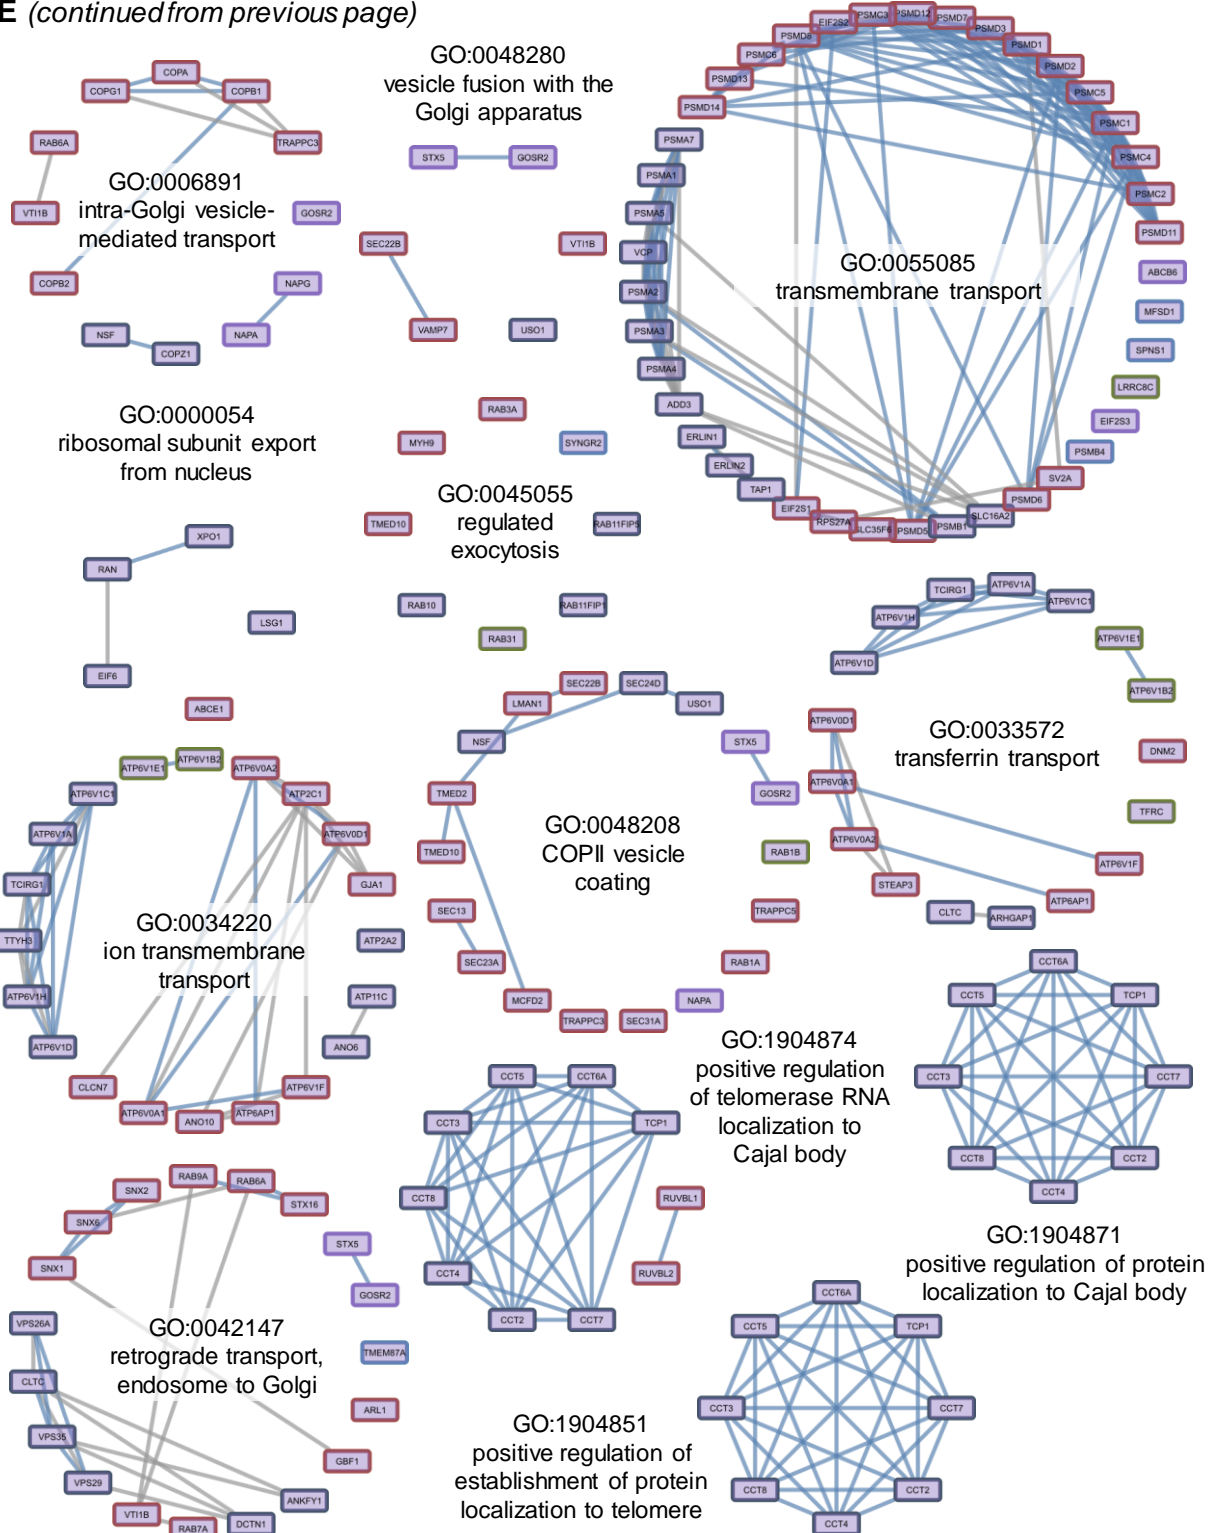



FIGURE S4

F

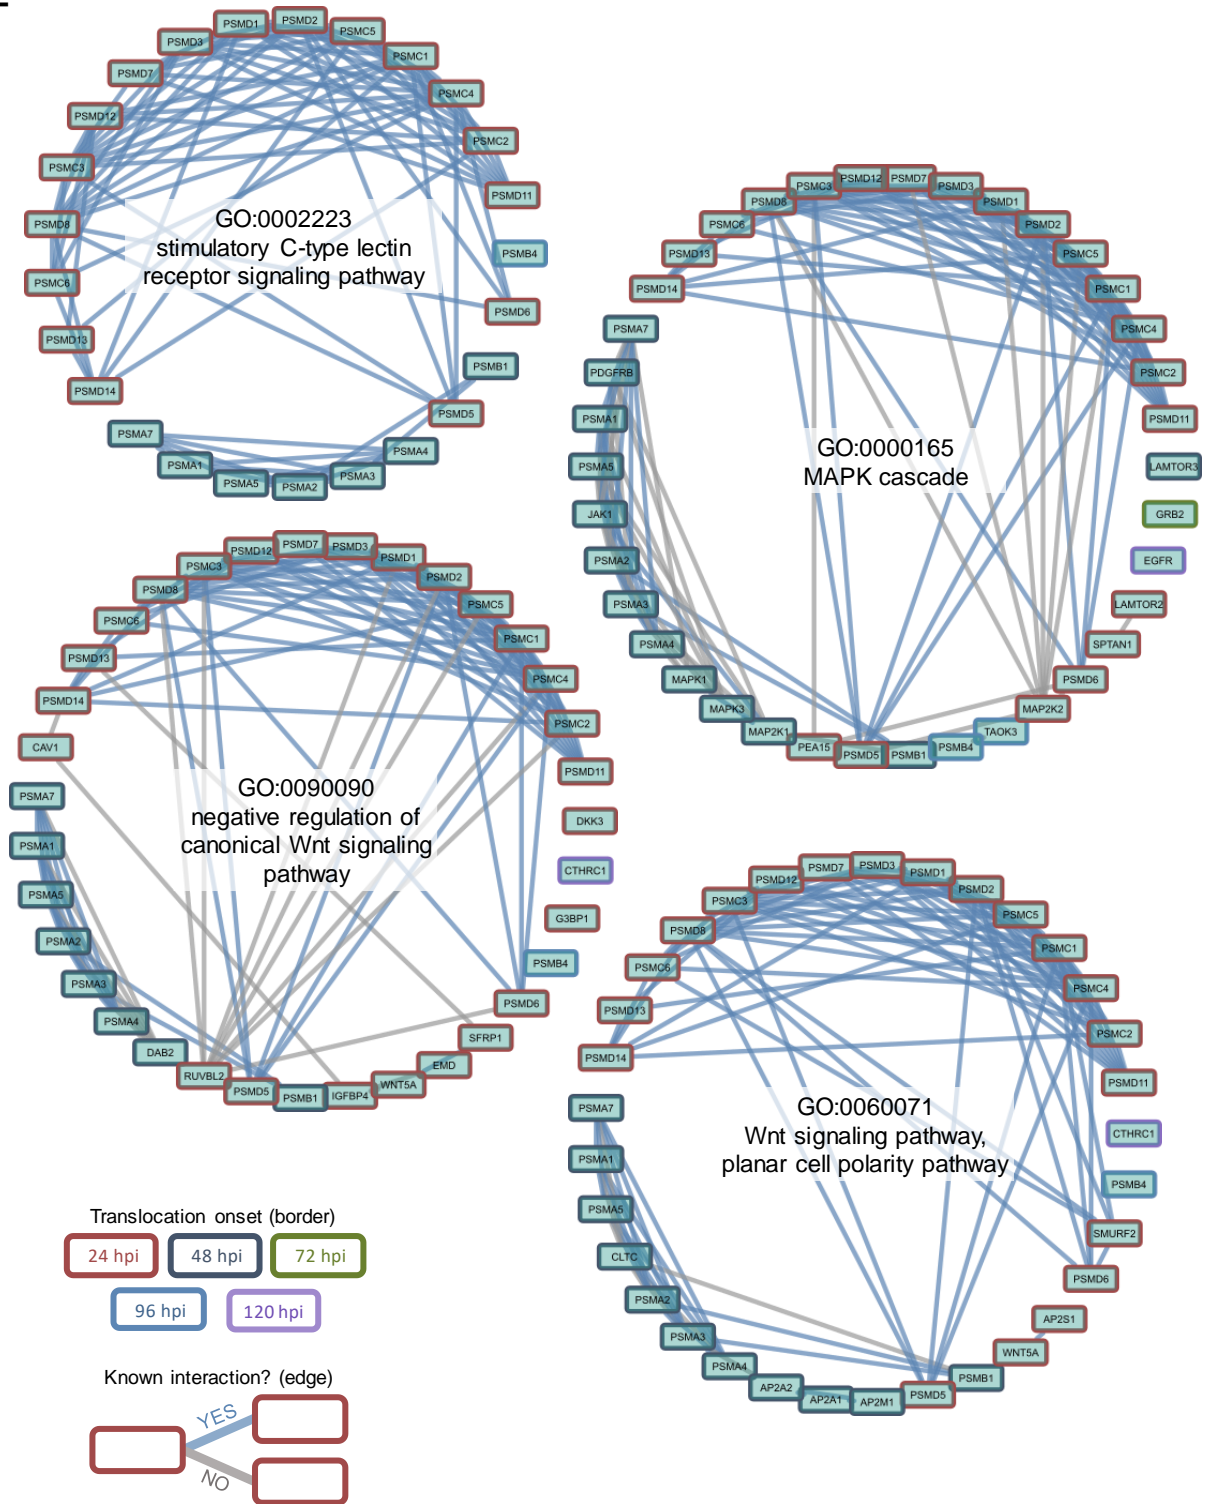

(continued on following page)

FIGURE S4

F (continued from previous page)

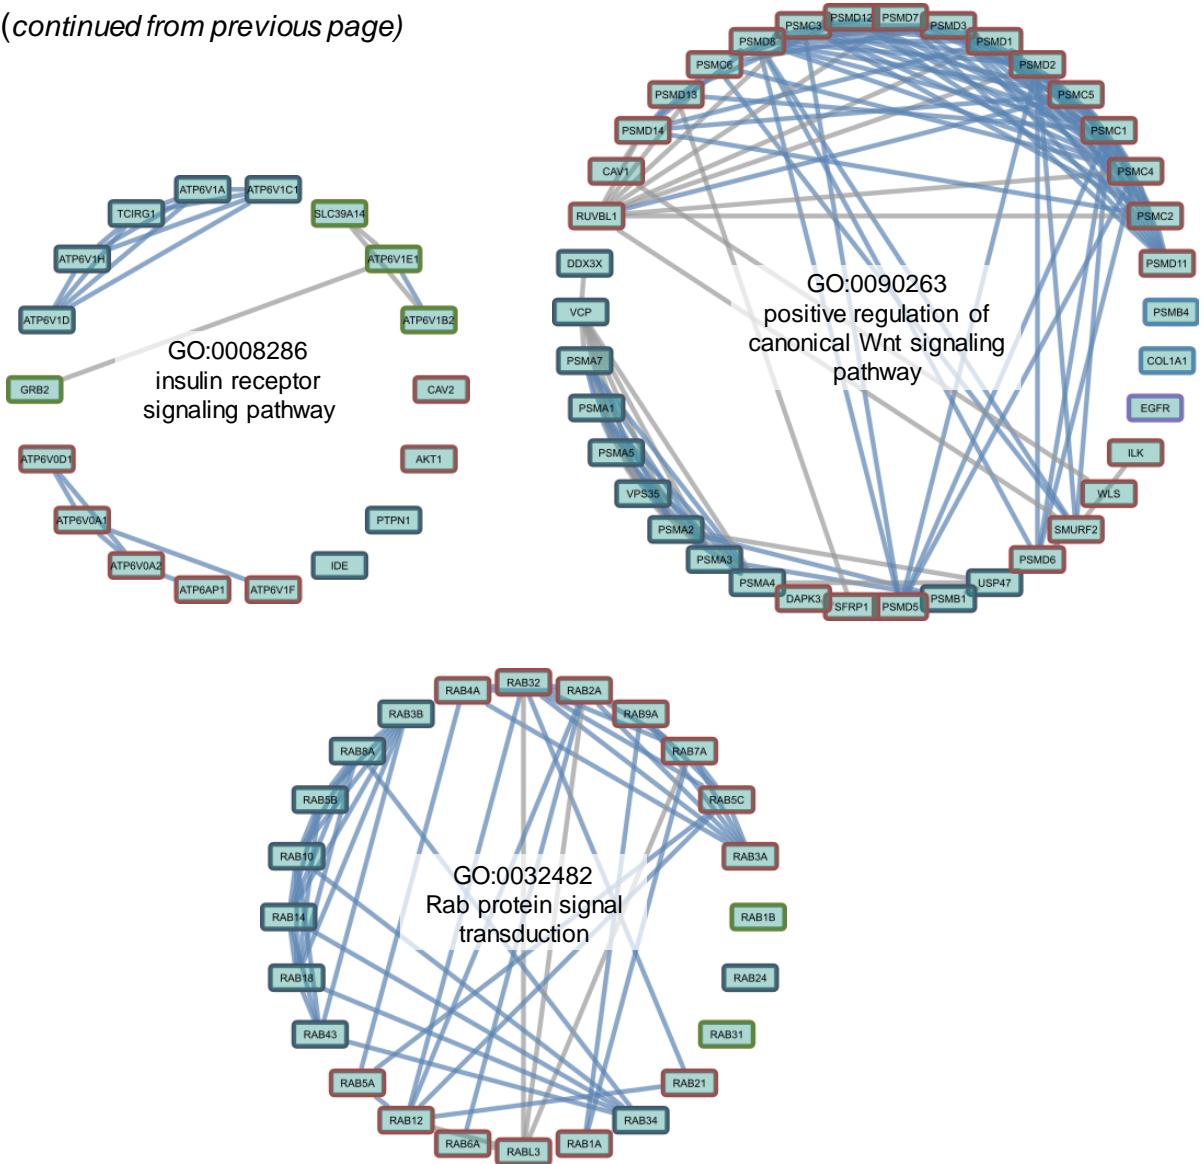

FIGURE S4

G

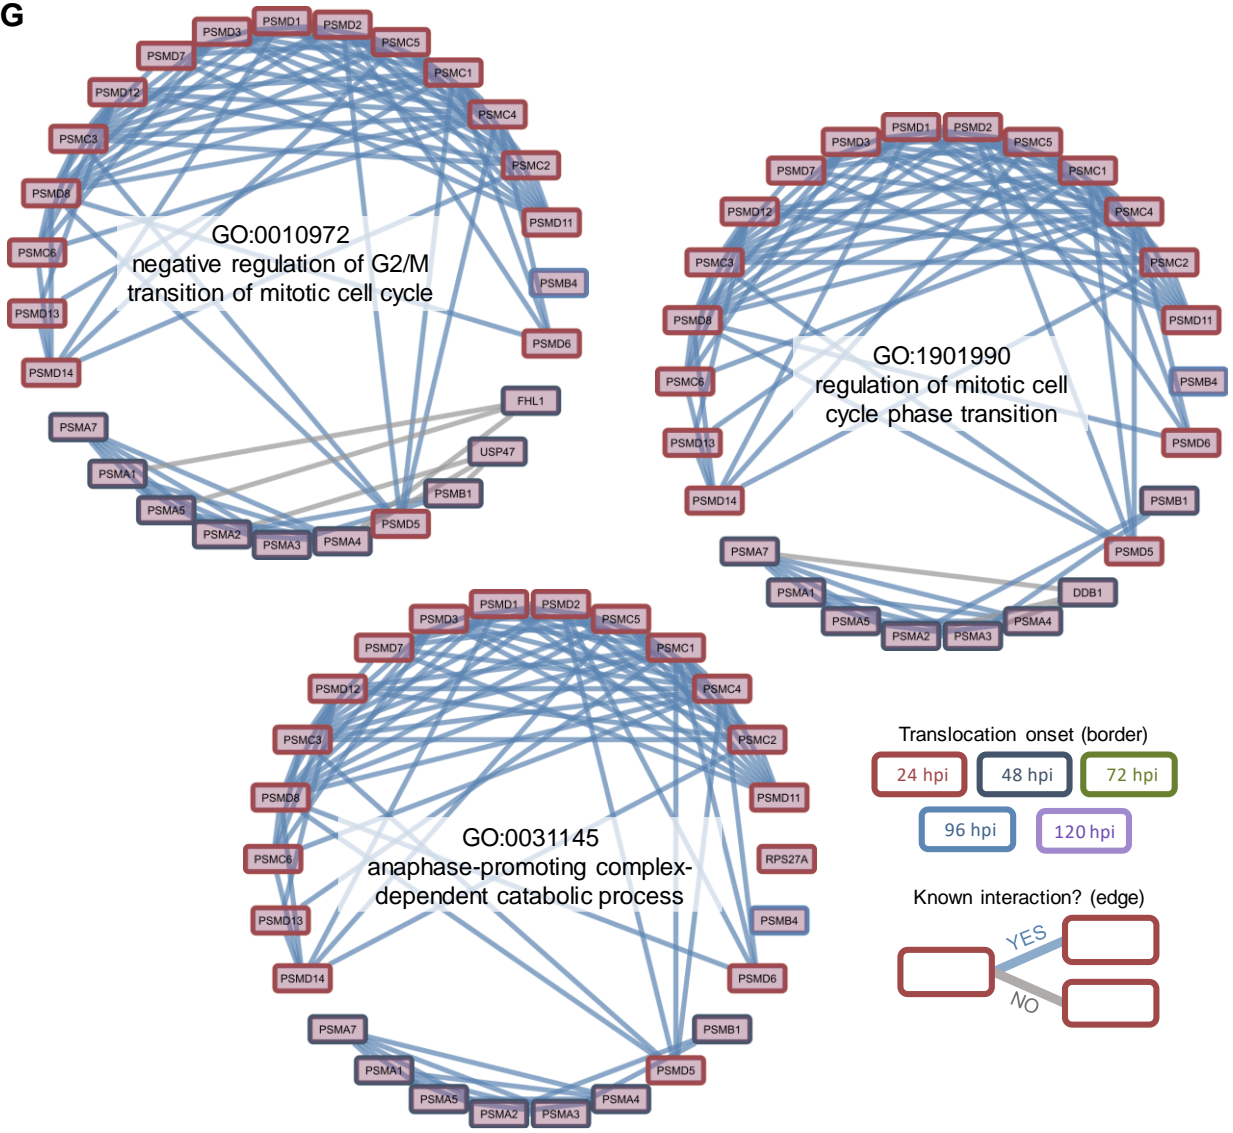

FIGURE S4

H

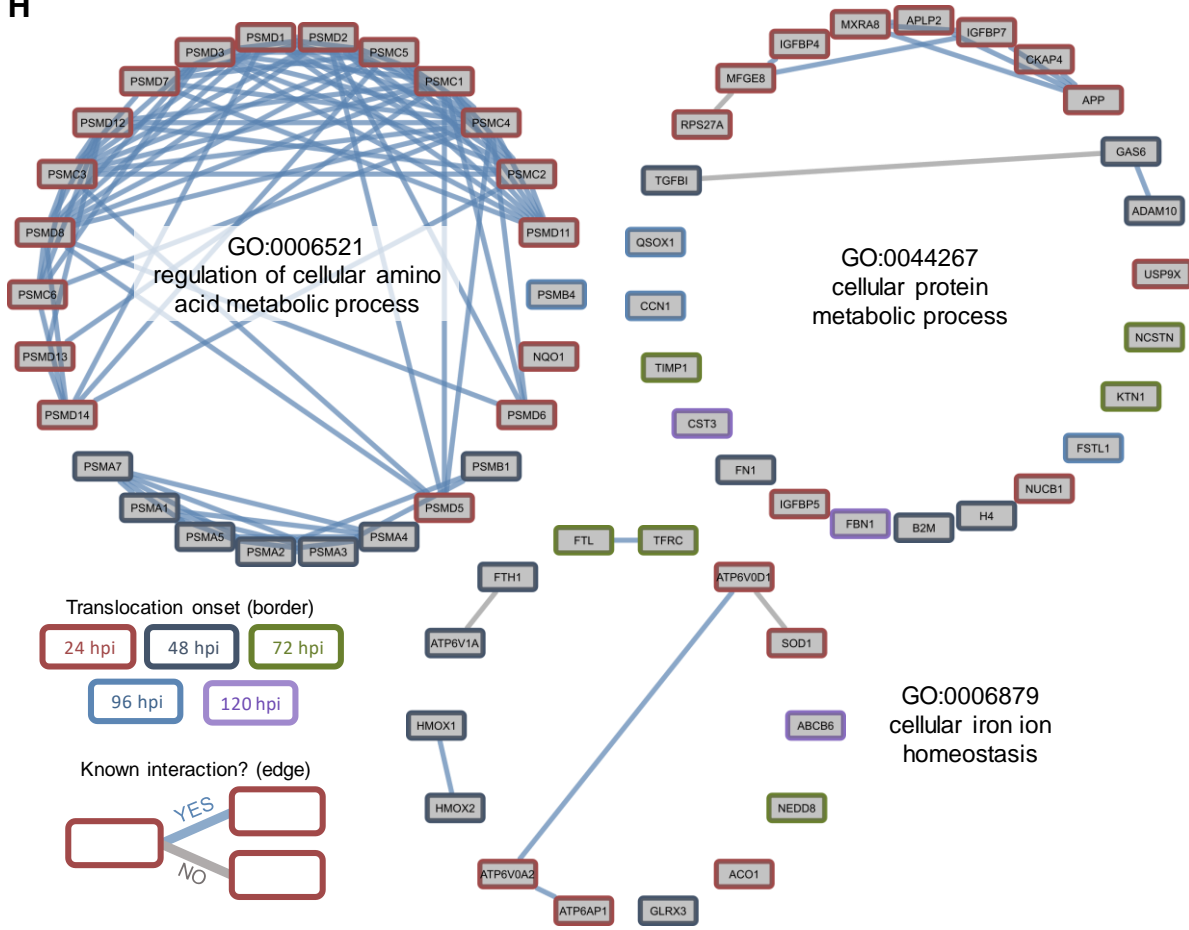

I

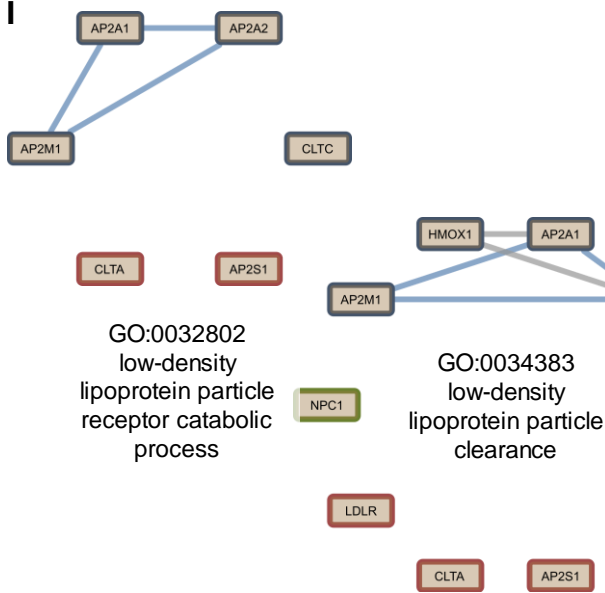

J

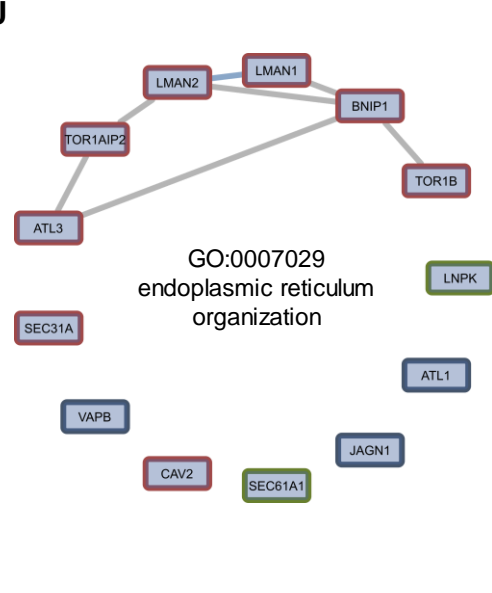

FIGURE S4

K

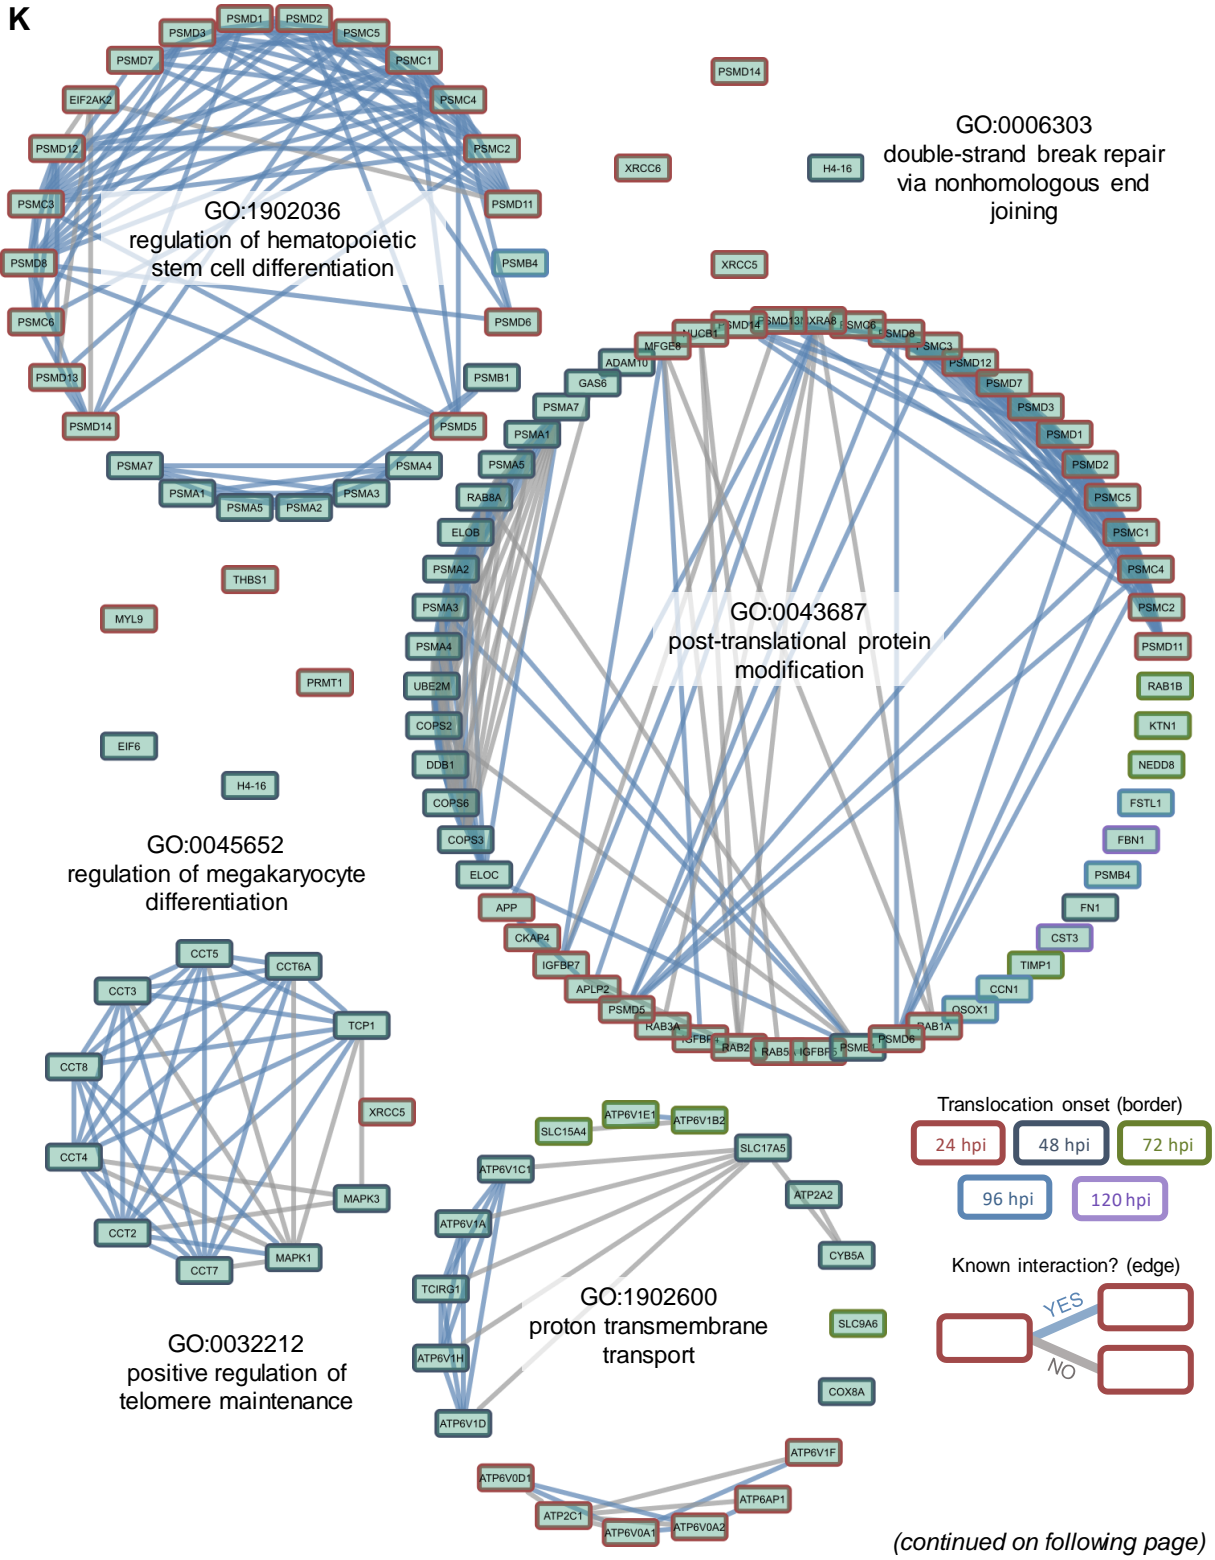

FIGURE S4

**K** (continued from previous page)

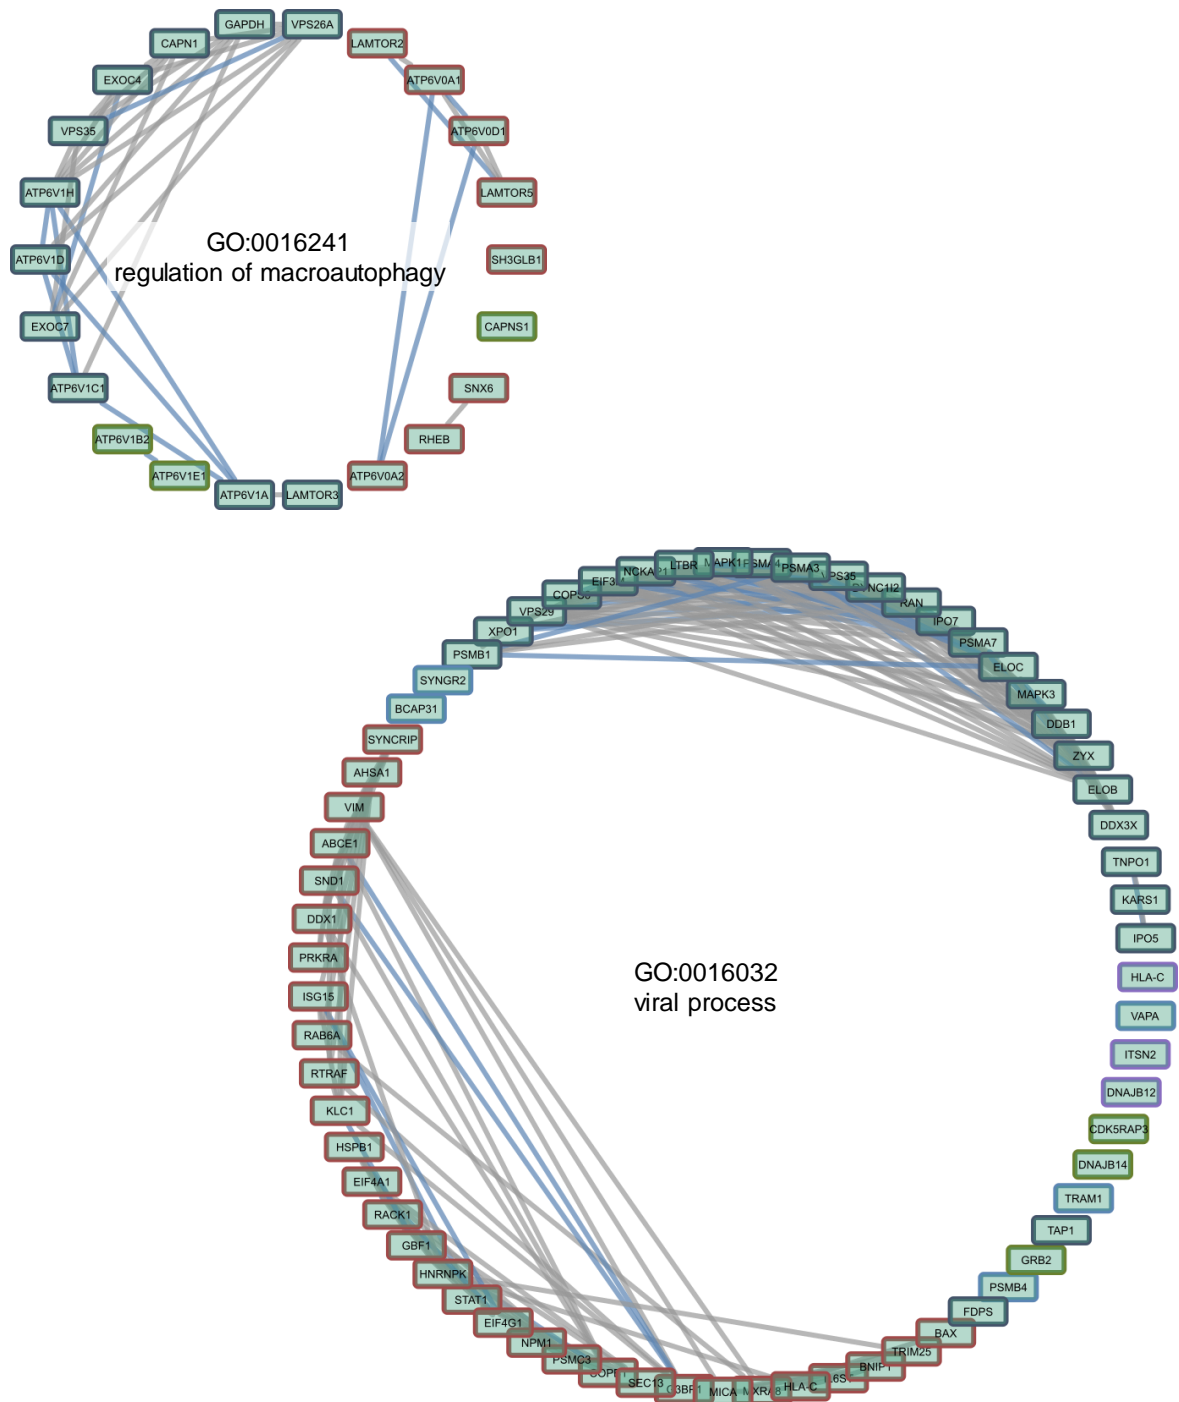

**Figure S4: Enriched gene ontology associations for translocating proteins.** Translocating proteins enriched for processes involved in **A)** immune signaling, **B)** transcription, **C)** translation, **D)** proteolysis, **E)** trafficking, **F)** signal transduction, **G)** cell cycle regulation, **H)** metabolism, **I)** cholesterol metabolism, **J)** subcellular organization, and **K)** “other” categories.

FIGURE S5

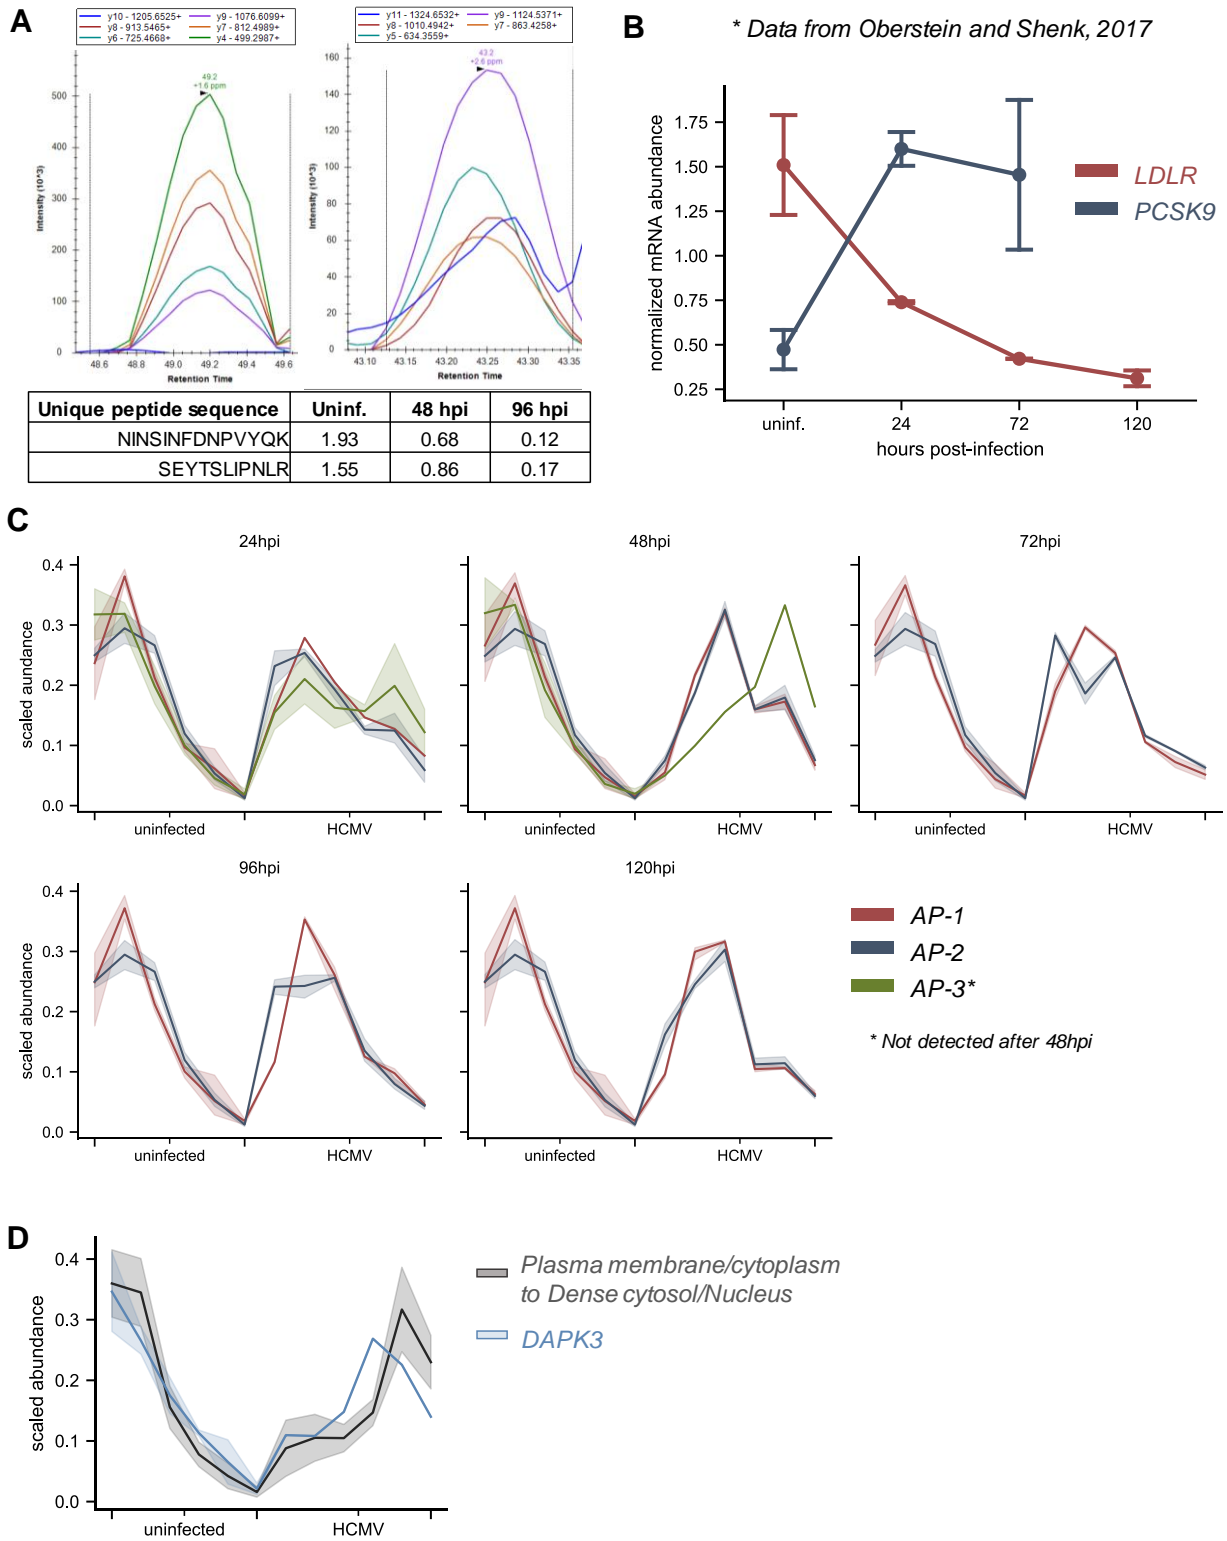

## FIGURE S5

**Figure S5: Investigating LDLR abundance, translocation profiles of adaptor protein complexes and DAPK3 induced upon HCMV infection.** **A)** Selected chromatograms from targeted parallel reaction monitoring of LDLR levels during infection. A representative chromatogram is shown for each unique peptide that was monitored, and normalized abundance levels are reported in the table below. **B)** LDLR and PCSK9 mRNA levels following HCMV infection from Oberstein and Shenk, 2017. Error bars represent the standard deviation from two biological replicates. **C)** Distinct spatiotemporal translocation profiles of clathrin adaptor protein complexes AP-1, AP-2, and AP-3. Solid lines and shaded ranges represent the mean and standard deviation, respectively, of changes in abundance value for protein subunits from a given complex. **D)** Translocation profile of DAPK3 relative to synthetic translocation profiles for plasma membrane/cytoplasm to dense cytosol/nucleus movements.
